# Supplementary material for: Screening for Higher Grain Yield and Biomass among Sixty Bread Wheat Genotypes Grown under Elevated CO2 and High-Temperature Conditions
Source: MDPI journal article supplement (doi:10.3390/plants10081596), 2021-08-03
Supplement: s1 [file s1]

**Table S1.** Correlation coefficient matrix for wheat production and grain yield components among sixty wheat genotypes grown under elevated CO<sub>2</sub> and high temperature.

|              | Stalk       | Chaff       | Grain<br>yield | Grain<br>number | Ear<br>number | Grain<br>weight | GYE          | GNE          | HI           | Height       |
|--------------|-------------|-------------|----------------|-----------------|---------------|-----------------|--------------|--------------|--------------|--------------|
| Aboveground  | <b>0.90</b> | <b>0.77</b> | <b>0.88</b>    | <b>0.76</b>     | <b>0.57</b>   | -0.11           | <b>0.31</b>  | <b>0.31</b>  | 0.00         | <b>0.15</b>  |
| Stalk        |             | <b>0.60</b> | <b>0.64</b>    | <b>0.57</b>     | <b>0.47</b>   | -0.10           | <b>0.15</b>  | <b>0.19</b>  | <b>-0.31</b> | <b>0.28</b>  |
| Chaff        |             |             | <b>0.60</b>    | <b>0.51</b>     | <b>0.47</b>   | 0.00            | <b>0.16</b>  | 0.11         | <b>-0.15</b> | 0.07         |
| Grain yield  |             |             |                | <b>0.85</b>     | <b>0.54</b>   | -0.11           | <b>0.45</b>  | <b>0.43</b>  | <b>0.42</b>  | 0.03         |
| Grain number |             |             |                |                 | <b>0.54</b>   | <b>-0.58</b>    | <b>0.32</b>  | <b>0.61</b>  | <b>0.35</b>  | -0.06        |
| Ear number   |             |             |                |                 |               | -0.16           | <b>-0.44</b> | <b>-0.29</b> | 0.10         | 0.02         |
| Grain weight |             |             |                |                 |               |                 | 0.05         | <b>-0.54</b> | -0.02        | <b>0.19</b>  |
| GYE          |             |             |                |                 |               |                 |              | <b>0.78</b>  | <b>0.37</b>  | 0.00         |
| GNE          |             |             |                |                 |               |                 |              |              | <b>0.32</b>  | -0.10        |
| HI           |             |             |                |                 |               |                 |              |              |              | <b>-0.27</b> |

GNE: grain number ear<sup>-1</sup>; GYE: grain yield ear<sup>-1</sup>; HI: harvest index.

Data was generated from Spearman correlation analysis. Values in bold represent significance ( $p < 0.05$ ).

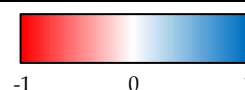

**Table S2.** Average days from sowing to ear emergence, anthesis and maturity developmental stages among sixty wheat genotypes grown under elevated CO<sub>2</sub> and high temperature.

| Genotype | Ee | Anthesis | Maturity | Genotype | Ee | Anthesis | Maturity | Genotype | Ee | Anthesis | Maturity |
|----------|----|----------|----------|----------|----|----------|----------|----------|----|----------|----------|
| 150      | 58 | 60       | 95       | 16       | 64 | 65       | 99       | 35       | 57 | 60       | 95       |
| 74       | 65 | 66       | 99       | 22       | 63 | 65       | 98       | 4        | 60 | 62       | 96       |
| 23       | 68 | 69       | 102      | 13       | 63 | 64       | 95       | 26       | 59 | 61       | 95       |
| 8        | 65 | 66       | 97       | 92       | 66 | 67       | 102      | 48       | 59 | 62       | 96       |
| 76       | 64 | 65       | 99       | 117      | 62 | 64       | 93       | 99       | 65 | 65       | 96       |
| 15       | 60 | 63       | 97       | 79       | 61 | 63       | 96       | 53       | 57 | 59       | 94       |
| 73       | 61 | 63       | 95       | 33       | 59 | 61       | 96       | 59       | 61 | 63       | 97       |
| 21       | 64 | 66       | 101      | 69       | 64 | 65       | 98       | 83       | 66 | 67       | 102      |
| 9        | 65 | 66       | 97       | 31       | 57 | 61       | 95       | 10       | 63 | 64       | 98       |
| 118      | 57 | 60       | 92       | 19       | 66 | 66       | 100      | 65       | 61 | 63       | 94       |
| 81       | 63 | 65       | 97       | 114      | 62 | 63       | 93       | 42       | 61 | 63       | 95       |
| 77       | 65 | 66       | 99       | 97       | 62 | 63       | 94       | 107      | 61 | 63       | 96       |
| 115      | 57 | 60       | 92       | 113      | 66 | 67       | 97       | 11       | 60 | 62       | 96       |
| 87       | 65 | 66       | 99       | 25       | 60 | 62       | 96       | 58       | 65 | 66       | 100      |
| 29       | 60 | 62       | 99       | 18       | 59 | 61       | 93       | 5        | 58 | 60       | 93       |
| 46       | 63 | 64       | 95       | 70       | 66 | 67       | 102      | 43       | 61 | 62       | 98       |
| 119      | 63 | 65       | 96       | 63       | 60 | 61       | 94       | 94       | 63 | 65       | 97       |
| 6        | 60 | 62       | 97       | 105      | 63 | 65       | 98       | 95       | 58 | 60       | 93       |
| 110      | 64 | 65       | 98       | 88       | 65 | 66       | 99       | 61       | 62 | 64       | 95       |
| 71       | 62 | 64       | 96       | 93       | 60 | 61       | 94       | 41       | 59 | 61       | 96       |

Ee: Ear emergence; GNE: grain number ear<sup>-1</sup>; GYE: grain yield ear<sup>-1</sup>; HI: harvest index.

Data was generated from Spearman correlation analysis. Values in bold represent significance ( $p < 0.05$ ).

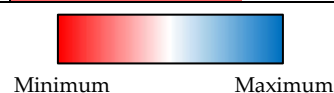

**Table S3.** Correlation coefficient matrix for average wheat production and grain yield components with days from sowing to ear emergence, anthesis and maturity developmental stages among sixty wheat genotypes grown under elevated CO<sub>2</sub> and high temperature.

|                     | Ear emergence | Anthesis     | Maturity     |
|---------------------|---------------|--------------|--------------|
| <b>Aboveground</b>  | -0,25         | <b>-0,29</b> | <b>-0,33</b> |
| <b>Stalk</b>        | -0,12         | -0,16        | <b>-0,31</b> |
| <b>Chaff</b>        | <b>-0,37</b>  | <b>-0,42</b> | <b>-0,40</b> |
| <b>Grain yield</b>  | -0,24         | -0,28        | -0,22        |
| <b>Grain number</b> | -0,09         | -0,13        | -0,10        |
| <b>Ear number</b>   | <b>-0,30</b>  | <b>-0,30</b> | <b>-0,35</b> |
| <b>Grain weight</b> | -0,08         | -0,03        | -0,03        |
| <b>GYE</b>          | 0,11          | 0,07         | 0,18         |
| <b>GNE</b>          | 0,14          | 0,09         | 0,19         |
| <b>HI</b>           | -0,04         | -0,01        | 0,23         |
| <b>Height</b>       | 0,21          | 0,21         | -0,13        |

GNE: grain number ear<sup>-1</sup>; GYE: grain yield ear<sup>-1</sup>; HI: harvest index.

Data was generated from Spearman correlation analysis. Values in bold represent significance ( $p < 0.05$ ).

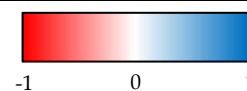

**Table S4.** Catalogue of the 60 wheat genotypes employed in the present study. Pedigree, accession code and top name of genotypes belonging to the Heat Tolerance Wheat Screening Nursery (8TH HTWSN) collection of the International Maize and Wheat Improvement Centre (CIMMYT) are provided.

| Cultivar                           | Genotype | Pedigree                                                                                                                                                            | Accession | Reception | Top Name                                             |
|------------------------------------|----------|---------------------------------------------------------------------------------------------------------------------------------------------------------------------|-----------|-----------|------------------------------------------------------|
|                                    |          |                                                                                                                                                                     |           | year      |                                                      |
| SUPER 152<br>BAJ #1<br>REEDLING #1 | 4        | PFAU/SERI.1B//AMADINA/3/WAXWING                                                                                                                                     | BW 43354  | 2009      | CGSS-02-Y-00153S-099M-099Y-099M-46Y-0B               |
|                                    | 5        | WAXWING/4/SONOITA F 81/TRAP #1/3/KAUZ*2/TRAP//KAUZ                                                                                                                  | BW 42811  | 2009      | CGSS01Y00134S-099Y-099M-099M-13Y-0B                  |
|                                    | 6        | -                                                                                                                                                                   | -         | -         | CMSS06Y00605T-099TOPM-099Y-099ZTM-099Y-099M-11WGY-0B |
|                                    | 8        | KACHU/KIRITATI                                                                                                                                                      | BW 49924  | 2012      | CMSS07Y00127S-0B-099Y-099M-099NJ-099NJ-6WGY-0B       |
|                                    | 9        | KACHU #1//WEEBILL1*2/KUKUNA                                                                                                                                         | BW 49925  | 2013      | CMSS07Y00129S-0B-099Y-099M-099NJ-099NJ-14WGY-0B      |
|                                    | 10       | KIRITATI/WEEBILL1//FRANCOLIN #1                                                                                                                                     | BW 49926  | 2012      | CMSS07Y00174S-0B-099Y-099M-099Y-5M-0WGY              |
|                                    | 11       | SUPER 152/BAJ #1                                                                                                                                                    | BW 49927  | 2012      | CMSS07Y00195S-0B-099Y-099M-099Y-16M-0WGY             |
|                                    | 13       | BAJ #1/3/KIRITATI//ATTILA*2/PASTOR                                                                                                                                  | BW 49930  | 2012      | CMSS07Y00288S-0B-099Y-099M-099Y-17M-0WGY             |
|                                    | 15       | SUPER 152/AKURI//SUPER 152                                                                                                                                          | BW 49936  | 2012      | CMSS07Y00965T-099TOPM-099Y-099M-099Y-23M-0WGY        |
|                                    | 16       | BECARD/FRANCOLIN                                                                                                                                                    | BW 49948  | 2012      | CMSS07B00235S-099M-099Y-099M-25WGY-0B                |
|                                    | 18       | BECARD//ND643/2*WEEBILL1                                                                                                                                            | BW 49950  | 2012      | CMSS07B00377S-099M-099NJ-099NJ-23WGY-0B              |
|                                    | 19       | FRET2*2/BRAMBLING//BECARD/3/WEEBILL1*2/BRAMBLING                                                                                                                    | BW 49952  | 2013      | CMSS07B00560T-099TOPY-099M-099Y-099M-19WGY-0B        |
|                                    | 21       | KACHU/BECARD//WEEBILL1*2/BRAMBLING                                                                                                                                  | BW 49954  | 2012      | CMSS07B00580T-099TOPY-099M-099Y-099M-10WGY-0B        |
|                                    | 22       | KAUZ/PASTOR//PBW343/3/KIRITATI/4/FRANCOLIN                                                                                                                          | BW 49955  | 2012      | CMSS07B00585T-099TOPY-099M-099Y-099M-11WGY-0B        |
|                                    | 23       | SUPER 152*2/TECUE #1                                                                                                                                                | BW 49956  | 2012      | CMSS07B00614T-099TOPY-099M-099Y-099M-49WGY-0B        |
|                                    | 25       | WEEBILL1*2/4/SONOITA F 81/TRAP #1/3/KAUZ*2/TRAP//KAUZ/5/BAJ #1                                                                                                      | BW 49388  | 2012      | CMSS06B00162S-0Y-099ZTM-099Y-099M-7WGY-0B            |
|                                    | 26       | NACAZARI F 76/TH.ACUTUM//3*PAVON F76/3/MIRLO/BUCKBUCK/4/ 2*PASTOR/5/T.DICOCCON PI94624/AE.SQUARROSA (409)//BACANORA T 88/ 6/WEEBILL4//BABAX.1B.1B*2/PARULA/3/PASTOR | BW 50018  | 2013      | CMSS06B01043T-099TOPY-099Y-39M-0Y-2B-0Y              |
|                                    | 29       | CHIBIA//PARULA II/CM65531/3/SUPER KAUZ/BAVIACORA M 92/4/MUNAL #1                                                                                                    | BW 50026  | 2013      | CMSS07Y00066S-0B-099Y-099M-099Y-43M-0WGY             |
|                                    | 31       | FRET2/TUKURU//FRET2/3/MUNAL #1                                                                                                                                      | BW 50028  | 2012      | CMSS07Y00093S-0B-099Y-099M-099NJ-099NJ-9WGY-0B       |
|                                    | 33       | KACHU #1//WEEBILL1*2/KUKUNA                                                                                                                                         | BW 50036  | 2013      | CMSS07Y00129S-0B-099Y-099M-099NJ-099NJ-12WGY-0B      |
|                                    | 35       | KACHU//KIRITATI/WEEBILL1                                                                                                                                            | BW 50038  | 2013      | CMSS07Y00130S-0B-099Y-099M-099NJ-099NJ-8WGY-0B       |
|                                    | 41       | SUPER 152/BAJ #1                                                                                                                                                    | BW 50048  | 2013      | CMSS07Y00195S-0B-099Y-099M-099Y-5M-0WGY              |
|                                    | 42       | SUPER 152/BAJ #1                                                                                                                                                    | BW 50049  | 2012      | CMSS07Y00195S-0B-099Y-099M-099Y-25M-0WGY             |
|                                    | 43       | SUPER 152//WEEBILL1*2/BRAMBLING                                                                                                                                     | BW 50050  | 2012      | CMSS07Y00196S-0B-099Y-099M-099Y-6M-0WGY              |
|                                    | 46       | BAJ #1/3/KIRITATI//ATTILA*2/PASTOR                                                                                                                                  | BW 50059  | 2012      | CMSS07Y00288S-0B-099Y-099M-099Y-3M-0WGY              |
|                                    | 48       | WHEATEAR*2/3/FRET2/WEEBILL1//TACUPETO F2001                                                                                                                         | BW 50085  | 2012      | CMSS07Y00794T-099TOPM-099Y-099M-099Y-3M-0WGY         |
|                                    | 53       | SUPER 152*2/MUU                                                                                                                                                     | BW 50107  | 2012      | CMSS07Y00964T-099TOPM-099Y-099M-099Y-8M-0WGY         |
|                                    | 58       | WEEBILL1*2/BRAMBLING//JUCHI F2000/3/WEEBILL1*2/BRAMBLING                                                                                                            | BW 50117  | 2013      | CMSS07Y01044T-099TOPM-099Y-099M-099Y-6M-0WGY         |
|                                    | 59       | WEEBILL1/KUKUNA//TACUPETO F2001*2/6/PAVON F 76//CARIANCA 422/ ANAHUAC F 75/5/BOBWHITE/CROW//BUCKBUCK/PAVON F 76/3/YECORA F 70/4/TRAP #1                             | BW 50119  | 2012      | CMSS07Y01070T-099TOPM-099Y-099M-099Y-20M-0WGY        |
|                                    | 61       | TOBARITO M 97/PASTOR*2//AKURI                                                                                                                                       | BW 50122  | 2013      | CMSS07Y01094T-099TOPM-099Y-099M-099NJ-099NJ-17WGY-0B |
|                                    | 63       | INQALAB 91*2/KUKUNA*2//HUIRIVIS #1                                                                                                                                  | BW 50126  | 2012      | CMSS07Y01115T-099TOPM-099Y-099M-099Y-9M-0WGY         |

Table S4. Continuation

|       |     |                                                                                                                                                                                                                                    |          |      |                                                 |
|-------|-----|------------------------------------------------------------------------------------------------------------------------------------------------------------------------------------------------------------------------------------|----------|------|-------------------------------------------------|
|       | 65  | SUPER 152/VILLA JUAREZ F2009                                                                                                                                                                                                       | BW 50150 | 2013 | CMSS07B00144S-099M-099Y-099M-5WGY-0B            |
|       | 69  | BECARD/FRANCOLIN                                                                                                                                                                                                                   | BW 50181 | 2012 | CMSS07B00235S-099M-099Y-099M-8WGY-0B            |
|       | 70  | BECARD/CHYAKHURA                                                                                                                                                                                                                   | BW 50184 | 2013 | CMSS07B00236S-099M-099Y-099M-13WGY-0B           |
|       | 71  | WEEBILL1*2/KUKUNA/4/WHEATEAR/KUKUNA/3/C80.1/3*BATAVIA//2*WEEBILL1                                                                                                                                                                  | BW 50185 | 2012 | CMSS07B00240S-099M-099Y-099M-12WGY-0B           |
|       | 73  | WEEBILL1/KUKUNA//TACUPETO F2001/4/WHEATEAR/KUKUNA/3/C80.1/3*BATAVIA//2*WEEBILL1                                                                                                                                                    | BW 50191 | 2012 | CMSS07B00245S-099M-099Y-099M-10WGY-0B           |
|       | 74  | WEEBILL1/KUKUNA//TACUPETO F2001/3/QUAIU #2                                                                                                                                                                                         | BW 50193 | 2012 | CMSS07B00246S-099M-099Y-099M-5WGY-0B            |
|       | 76  | WHEATEAR/KUKUNA/3/C80.1/3*BATAVIA//2*WEEBILL1/4/QUAIU                                                                                                                                                                              | BW 50196 | 2012 | CMSS07B00264S-099M-099NJ-099NJ-2WGY-0B          |
|       | 77  | WHEATEAR/KUKUNA/3/C80.1/3*BATAVIA//2*WEEBILL1/4/QUAIU                                                                                                                                                                              | BW 50197 | 2012 | CMSS07B00264S-099M-099NJ-099NJ-7WGY-0B          |
|       | 79  | SUPER 152/CHYAKHURA #1                                                                                                                                                                                                             | BW 50208 | 2013 | CMSS07B00339S-099M-099Y-099M-11WGY-0B           |
|       | 81  | PBW 65/2*PASTOR/3/KIRITATI//PBW 65/2*SERI.1B/4/DANPHE #1                                                                                                                                                                           | BW 50215 | 2012 | CMSS07B00513T-099TOPY-099M-099Y-099M-12WGY-0B   |
|       | 83  | CIANO T 79//PF70354/MUSALA/3/PASTOR/4/BAVIACORA M 92/5/KIRITATI//ATTILA*2/PASTOR/6/CHYAKHURA                                                                                                                                       | BW 50229 | 2013 | CMSS07B00550T-099TOPY-099M-099Y-099M-6WGY-0B    |
|       | 87  | KACHU/BECARD//WEEBILL1*2/BRAMBLING                                                                                                                                                                                                 | BW 50238 | 2013 | CMSS07B00580T-099TOPY-099M-099NJ-099NJ-32WGY-0B |
|       | 88  | KACHU/BECARD//WEEBILL1*2/BRAMBLING                                                                                                                                                                                                 | BW 50239 | 2013 | CMSS07B00580T-099TOPY-099M-099NJ-099NJ-34WGY-0B |
|       | 92  | SUPER 152*2/TECUE #1                                                                                                                                                                                                               | BW 50248 | 2013 | CMSS07B00614T-099TOPY-099M-099Y-099M-16WGY-0B   |
|       | 93  | WEEBILL1*2/KUKUNA//KIRITATI/3/WEEBILL1*2/KUKUNA                                                                                                                                                                                    | BW 50263 | 2013 | CMSS07B00682T-099TOPY-099M-099Y-099M-22WGY-0B   |
|       | 94  | WEEBILL1*2/KURUKU*2//SUPER 152                                                                                                                                                                                                     | BW 50264 | 2013 | CMSS07B00685T-099TOPY-099M-099Y-099M-17WGY-0B   |
|       | 95  | FRET2/KUKUNA//FRET2/3/HEILO/4/BLOUK #1                                                                                                                                                                                             | BW 50266 | 2013 | CMSS07B00715T-099TOPY-099M-099Y-099M-7WGY-0B    |
|       | 97  | ND643/2*WEEBILL1//ATTILA*2/PBW 65/3/MUNAL                                                                                                                                                                                          | BW 50270 | 2012 | CMSS07B00807T-099TOPY-099M-099NJ-099NJ-1WGY-0B  |
|       | 99  | ND643//2*ATTILA*2/PASTOR/3/WEEBILL1*2/KURUKU/4/WEEBILL1*2/BRAMBLING                                                                                                                                                                | BW 50276 | 2012 | CMSS07B00833T-099TOPY-099M-099NJ-099NJ-3WGY-0B  |
|       | 105 | REH/HARE//2*BACANORA T 88/3/CROC_1/AE.SQUARROSA (213)//PAPAGO M 86/4/HUITES F 95/5/T.DICOCCON PI94624/AE.SQUARROSA (409)//BACANORA T 88/6/REH/HARE//2*BACANORA T 88/3/CROC_1/AE.SQUARROSA (213)//PAPAGO M 86/4/HUITES F 95/7/MUTUS | BW 49979 | 2013 | CMSS07Y01305T-099Y-43M-0Y-2B-0Y                 |
|       | 107 | BLOUK #1//TACUPETO F2001*2/KIRITATI                                                                                                                                                                                                | BW 50284 | 2013 | CMSS07Y00036S-0B-099Y-099M-099NJ-099NJ-1RGY-0B  |
|       | 110 | QUAIU #3//TACUPETO F2001*2/KIRITATI                                                                                                                                                                                                | BW 50287 | 2013 | CMSS07Y00040S-0B-099Y-099M-099NJ-099NJ-5RGY-0B  |
|       | 113 | FRANCOLIN #1/2*BLOUK #1                                                                                                                                                                                                            | BW 50296 | 2013 | CMSS07Y00670T-099TOPM-099Y-099M-099Y-11M-0RGY   |
|       | 114 | PFAU/WEAVER*2//TUKURU/3/BLOUK #1/4/QUAIU                                                                                                                                                                                           | BW 50298 | 2013 | CMSS07Y00695T-099TOPM-099Y-099M-099Y-11M-0RGY   |
|       | 115 | VOROBAY/FISCAL//KACHU/3/WEEBILL1*2/BRAMBLING                                                                                                                                                                                       | BW 50299 | 2013 | CMSS07Y00706T-099TOPM-099Y-099M-099Y-11M-0RGY   |
|       | 117 | WEEBILL1*2/BRAMBLING/5/WEEBILL1*2/4/SONOITA F 81/TRAP #1/3/KAUZ*2//TRAP//KAUZ/6/WEEBILL1*2/BRAMBLING                                                                                                                               | BW 50303 | 2013 | CMSS07Y00815T-099TOPM-099Y-099M-099Y-9M-0RGY    |
|       | 118 | BLOUK #1/MUNAL                                                                                                                                                                                                                     | BW 50308 | 2013 | CMSS07B00024S-099M-099Y-099M-21RGY-0B           |
|       | 119 | BECARD/3/PASTOR//MUNIA/ALTAR 84                                                                                                                                                                                                    | BW 50313 | 2013 | CMSS07B00468S-099M-099Y-099M-18RGY-0B           |
| GAZUL | 150 |                                                                                                                                                                                                                                    | 20351    | 1992 |                                                 |

**Table S5.** Statistical design with tests employed, assessed assumptions for each test, central tendency estimator used and indices for the effect size.

| One-group comparison       |                             |                             | Multiple group comparison: Independent measures |                                          |                                    |                                            |
|----------------------------|-----------------------------|-----------------------------|-------------------------------------------------|------------------------------------------|------------------------------------|--------------------------------------------|
| Assumptions                | Normal distribution         | Non-normal distribution     | Normal distribution                             |                                          | Non-normal distribution            |                                            |
|                            | -                           | -                           | Homogeneity of variances                        | Heterogeneity of variances               | Homogeneity of variances           | Heterogeneity of variances                 |
|                            | -                           | -                           | Unbalanced groups                               | Un/balanced groups                       | Un/balanced groups                 | Un/balanced groups                         |
|                            | Absence of extreme outliers | Absence of extreme outliers | Absence of extreme outliers                     | Absence of extreme outliers              | Dealing with extreme outliers      | Dealing with extreme outliers              |
| Type of analysis           | T test                      | Wilcoxon test               | ANOVA                                           | ANOVA with heteroscedasticity correction | Kruskal-Wallis (K-W) test          | Robust ANOVA for medians                   |
| R function                 | <i>t_test</i><br>[1]        | <i>wilcox_test</i><br>[1]   | <i>anova_test</i><br>[1]                        | <i>anova_test</i><br>[1]                 | <i>Kruskal_test</i><br>[1]         | <i>med1way</i><br>[2]                      |
| Post-hoc test              | -                           | -                           | Pairwise T test                                 | Pairwise T test                          | Wilcox                             | Pairwise permutation tests for percentiles |
| R function                 | -                           | -                           | <i>pairwise.t.test</i><br>[3]                   | <i>pairwise.t.test</i><br>[3]            | <i>pairwise.wilcox.test</i><br>[1] | <i>pairwisePercentileTest</i><br>[4]       |
| Central tendency estimator | Mean                        | Trimmed mean (20%)          | Mean                                            | Mean                                     | Median                             |                                            |
| Effect size                | Indices                     |                             | $\eta^2$                                        | $\eta^2$                                 | $\omega^2$                         |                                            |
|                            | R function                  |                             | Included in                                     | <i>eta.F</i>                             | <i>omega.F</i>                     |                                            |
|                            |                             |                             | <i>anova_test</i> [1]                           | [5]                                      | [5]                                |                                            |
|                            | Interpretation              |                             |                                                 |                                          |                                    |                                            |
|                            | No effect                   | $d < 0.20$                  | $\eta^2 < 0.01$                                 |                                          | $\omega^2 < 0.01$                  |                                            |
|                            | Small                       | $0.20 \leq d < 0.50$        | $0.01 \leq \eta^2 < 0.06$                       |                                          | $0.01 \leq \omega^2 < 0.06$        |                                            |
|                            | Medium                      | $0.50 \leq d < 0.80$        | $0.06 \leq \eta^2 < 0.14$                       |                                          | $0.06 \leq \omega^2 < 0.14$        |                                            |
|                            | Large                       | $d \geq 0.80$               | $\eta^2 \geq 0.14$                              |                                          | $\omega^2 \geq 0.14$               |                                            |

Note\*: The Benjamini, Hochberg, and Yekutieli method for the false discovery rate control was applied for pairwise comparisons (*pairwise.t.test* [3]), with corrections for homo/heterogeneity of variances.

Other references employed to perform this table:

- Selection of tests: [6–10]
- Effect size: [7,11–15]

## References

1. Kassambara, A. rstatix: Pipe-friendly framework for basic statistical tests 2021.
2. Mair, P.; Schoenbrodt, F.; Wilcox, R. WRS2: Wilcox robust estimation and testing 2016.
3. Team R Development Core A Language and Environment for Statistical Computing. *R Found. Stat. Comput.* **2018**, *2*, <https://www.R-project.org>.
4. Mangiafico, S. rcompanion: Functions to Support Extension Education Program Evaluation 2020.
5. Buchanan, E.M.; Gillenwaters, A.; Scofield, J.E.; Valentine, K.D. MOTE: Measure of the Effect: Package to assist in effect size calculations and their confidence intervals 2019.
6. Kassambara, A. *Practical Statistics in R II - Comparing Groups: Numerical Variables*; Datanovia, 2019;
7. Mair, P.; Wilcox, R.; Patil, I. Robust Statistical Methods Using WRS2 (vignette) 2021, 41.
8. García-Pérez, A. Métodos avanzados de estadística aplicada. Métodos robustos y de remuestreo. **2005**, 256.
9. Mair, P.; Wilcox, R. Robust Statistical Methods Using WRS2. *Behav. Res. Methods* **2020**, *52*, 464–488, doi:10.3758/s13428-019-01246-w.
10. Mangiafico, S.S. *Summary and analysis of extension program evaluation in R*; 2016;
11. Ben-Shachar, M.; Lüdtke, D.; Makowski, D. effectsize: Estimation of Effect Size Indices and Standardized Parameters. *J. Open Source Softw.* **2020**, *5*, 2815, doi:10.21105/joss.01412.
12. Sullivan, G.M.; Feinn, R. Using Effect Size—or Why the P Value Is Not Enough. *J. Grad. Med. Educ.* **2012**, *4*, 279–282, doi:10.4300/jgme-d-12-00156.1.
13. Kotrlik, J.; Williams, H.; Jabor, K. Reporting and interpreting Effect Size in quantitative agricultural education research. *J. Agric. Educ.* **2011**, *52*, 132–142, doi:10.5032/jae.2011.01132.
14. Ellis, P.D. *The essential guide to Effect Sizes: Statistical power, meta-analysis, and the interpretation of research results*; Cambridge University Press: Cambridge, 2010; ISBN 9780511761676.
15. Brydges, C.R. Effect Size guidelines, sample size calculations, and statistical power in gerontology. *Innov. Aging* **2019**, *3*, 1–8, doi:10.1093/geroni/igz036.
